# Supplementary material for: Plasma modification of poly(2-heptadecyl-4-vinylthieno[3,4-d]thiazole) low bandgap polymer and its application in solar cells
Source: Royal Society of Chemistry journal article supplement (doi:10.1039/c4cp03323j), 2014-10-28
Supplement: c4cp03323j1.pdf [file c4cp03323j1.pdf]

## Supporting Information

### Plasma modification of Poly(2-heptadecyl-4-vinylthieno[3,4-d]thiazole) low bandgap polymer and its application in solar cell

Pankaj Attri,<sup>a</sup> Vishal Bharti,<sup>b</sup> Jitender Gaur,<sup>b</sup> Young Sun Kim,<sup>c</sup> Suresh Chand,<sup>b</sup> Gi-Chung Kwon,<sup>a</sup> Seung-Hyun Lee,<sup>d</sup> Weontae Lee,<sup>e</sup> Eun Ha Choi\*,<sup>a</sup> In Tae Kim\*<sup>c</sup>

<sup>a</sup>Plasma BioScience Research Center / Department of Electrophysics, Kwangwoon University, Seoul, Korea 139-701.

<sup>b</sup>Council of Scientific and Industrial Research-National Physical Laboratory, Dr. K. S. Krishnan Marg, New Delhi-110012, India.

<sup>c</sup>Department of Chemistry, Kwangwoon University, Seoul, Korea 139-701

<sup>d</sup>Graduate School of Information Contents, Kwangwoon University, Seoul, Korea 139-701

<sup>e</sup>Department of Biochemistry, College of Life Science & Biotechnology, Yonsei University, Seoul, 120-749, Korea

#### *Poly(2-heptadecyl-4-vinylthieno[3,4-d]thiazole) (PHVTT)*

4,6-dibromo-2-heptadecyl-thieno[3,4-d]thiazole [1] (0.35 g, 0.650 mmol), 1-(dibutyl((E)-2-(tributylstannyl)vinylstannyl)butane (0.39 g, 0.065 mmol), and Pd(PPh<sub>3</sub>)<sub>4</sub>(0) (0.02 g, 0.025 mmol) were placed in 100-mL 3-neck round bottom flask equipped with a condenser, purged with N<sub>2</sub> gas and subsequently dissolved in 20 mL of toluene, from which oxygen was removed by purging with nitrogen for 1 h. The resulting mixture were stirred at 120 °C for 72 hours, after which 20 µL of 2-bromothiophene was injected as a capping agent. The reaction was stirred for 2 hr at 120 °C before 20 µL of 2-(tributyltin) thiophene was injected to complete the end-capping. The reaction mixtures were cooled and filtered to separate a blue solid as polymer. The blue polymer as product was purified by ethanol and acetone to yield a pure conducting a deep blue solid. The yield was 81%. It was soluble in common organic solvents such as CHCl<sub>3</sub>, CH<sub>2</sub>Cl<sub>2</sub>, and THF. Mn= 9980, Mw= 26499, PD = 2.655. <sup>1</sup>H NMR (400MHz, CDCl<sub>3</sub>): δ= 7.19(m, 1H), 7.17(m, 1H), 2.92(m, 2H), 1.79(m, 2H), 1.22(m, 28H), 0.81(m, 3H) ppm ; <sup>13</sup>C NMR (400MHz, CDCl<sub>3</sub>): δ= 22.71, 29.40, 29.79, 31.95, 76.68, 77.00, 77.32, 133.01, 140.97, 142.91, 170.90 ppm ; FT-IR (KBr) ν 3002, 2941, 2880,1620cm<sup>-1</sup>

[1] I. T. Kim, J. H. Lee, S.W.R.L. Lee, *Bul. Korean Chem. Soc.* **2007**, 28, 2511-2513.

## Figure Captions

**Fig. S1.** The emission spectra of atmospheric-pressure plasma jet (APPJ) with Air as feeding gas.

**Fig. S2** The emission spectra of atmospheric-pressure plasma jet (APPJ) with Ar as feeding gas.

**Fig. S3** Schematic view of the  $\gamma$ -focused ion beam ( $\gamma$ -FIB) consisting of the thermal electron source, the ionization region of ions, the electrostatic single Einzel lens that focused the ion beam, and the collector and copper pad for the measurement of the secondary electron emissions from the surface of the polymer thin films.

**Fig. S4** Cyclic voltammograms of the polymer films before and after plasma treatment using active electrode of carbon, reference electrode of Ag/AgNO<sub>3</sub> and counter platinum electrode of (a) polymer, (b) polymer treated with Air plasma, (c) polymer treated with N<sub>2</sub> plasma and (d) polymer treated with Ar plasma.

**Fig. S5** Carbon 1s spectra from (a) polymer, (b) polymer treated with Air plasma, (c) polymer treated with N<sub>2</sub> plasma and (d) polymer treated with Ar plasma.

**Fig. S6** Oxygen 1s spectra from (a) polymer, (b) polymer treated with Air plasma, (c) polymer treated with N<sub>2</sub> plasma and (d) polymer treated with Ar plasma.

**Fig. S7** Nitrogen 1s spectra from (a) polymer, (b) polymer treated with Air plasma, (c) polymer treated with N<sub>2</sub> plasma and (d) polymer treated with Ar plasma.

**Fig. S8** Sulfur 2p spectra from (a) polymer, (b) polymer treated with Air plasma, (c) polymer treated with N<sub>2</sub> plasma and (d) polymer treated with Ar plasma.

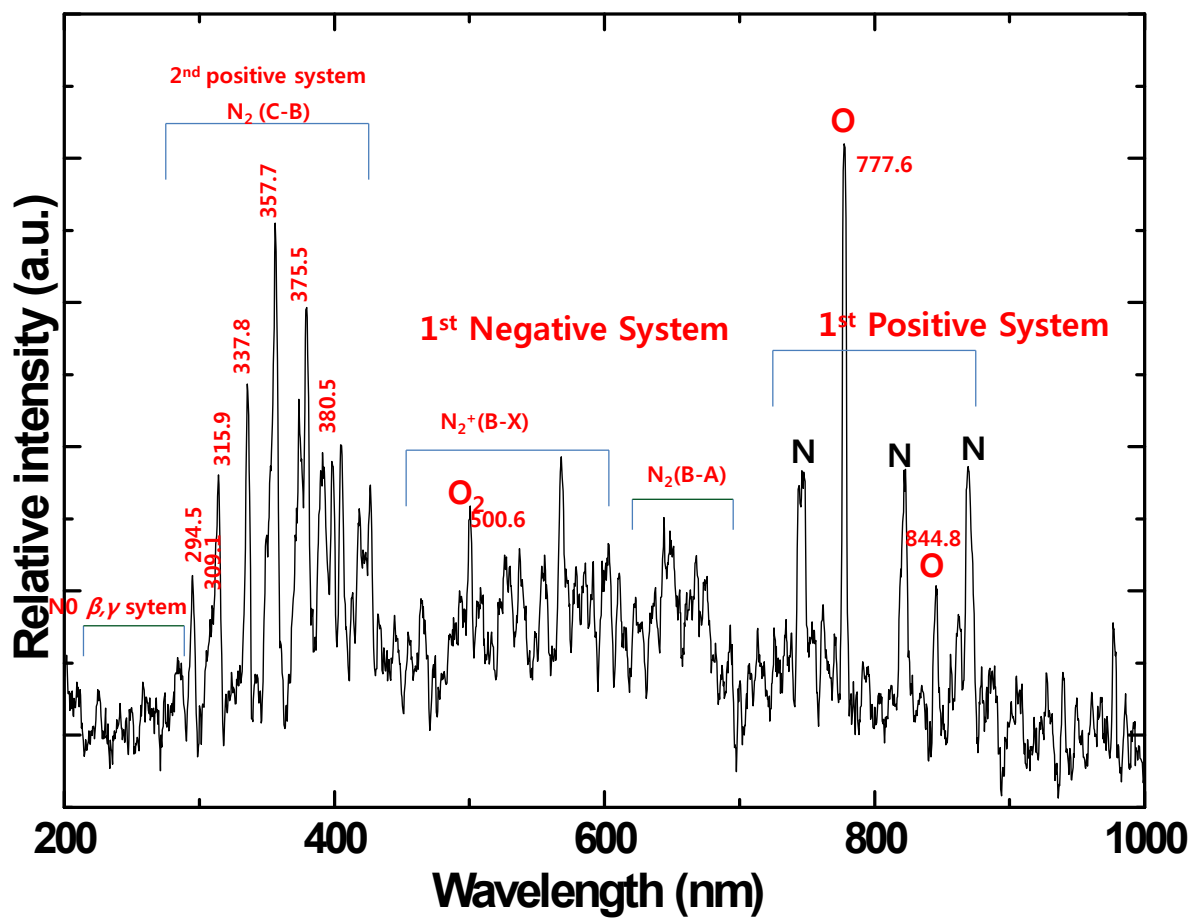

Fig. S1.

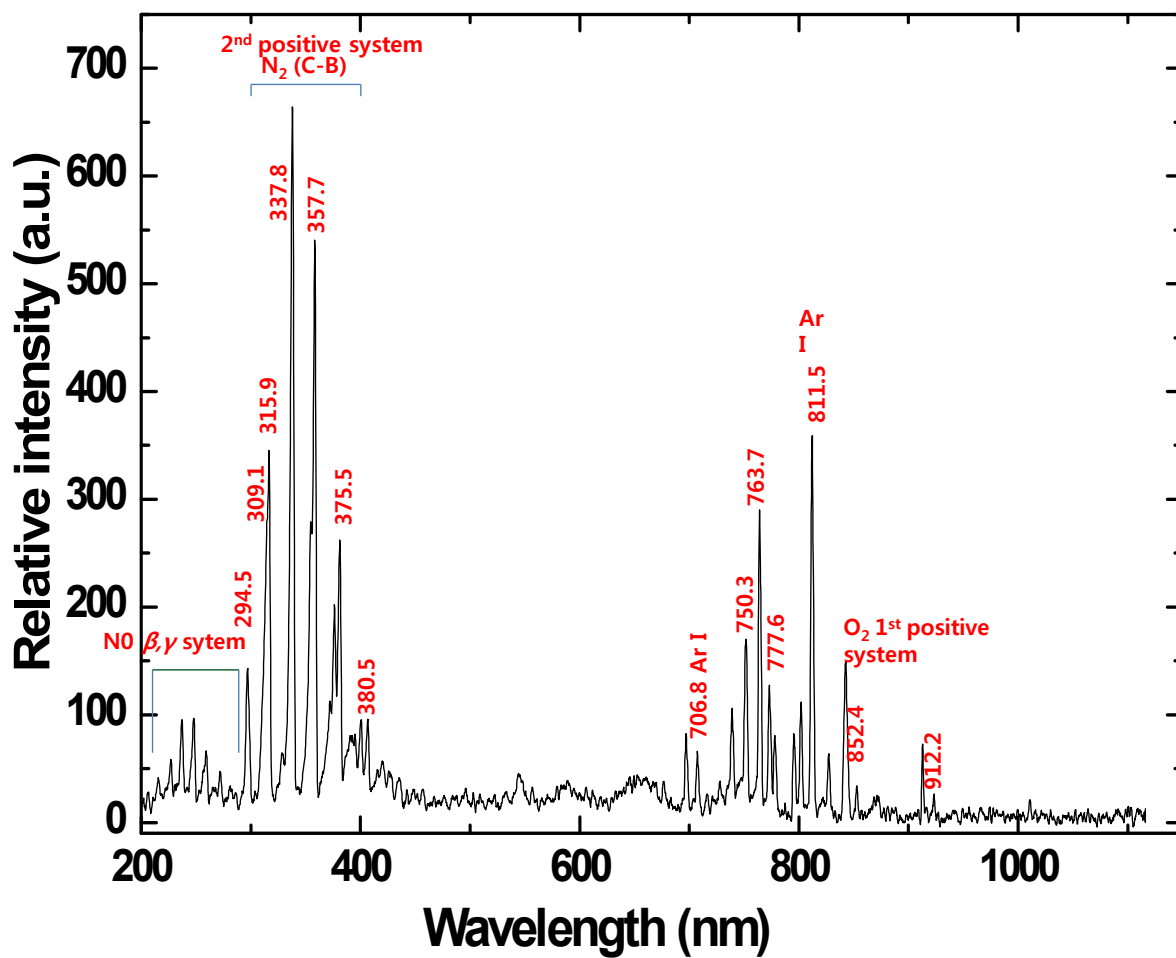

Fig. S2.

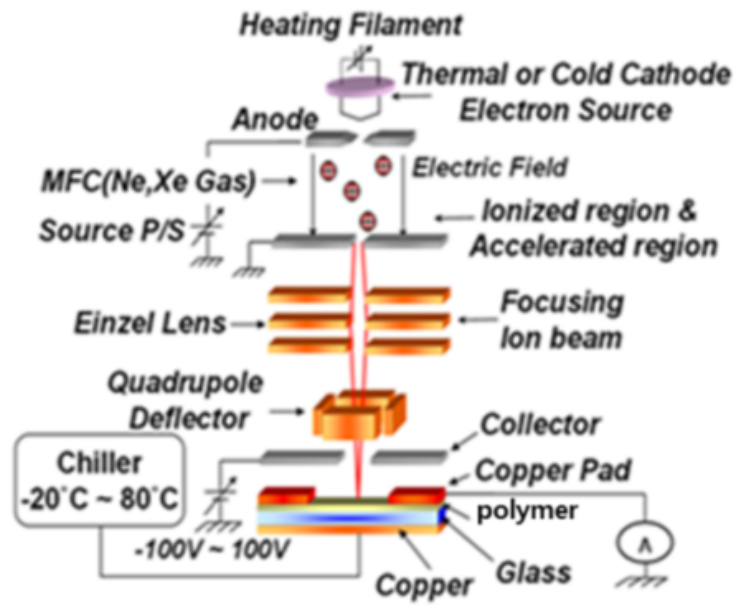

Fig.S3.

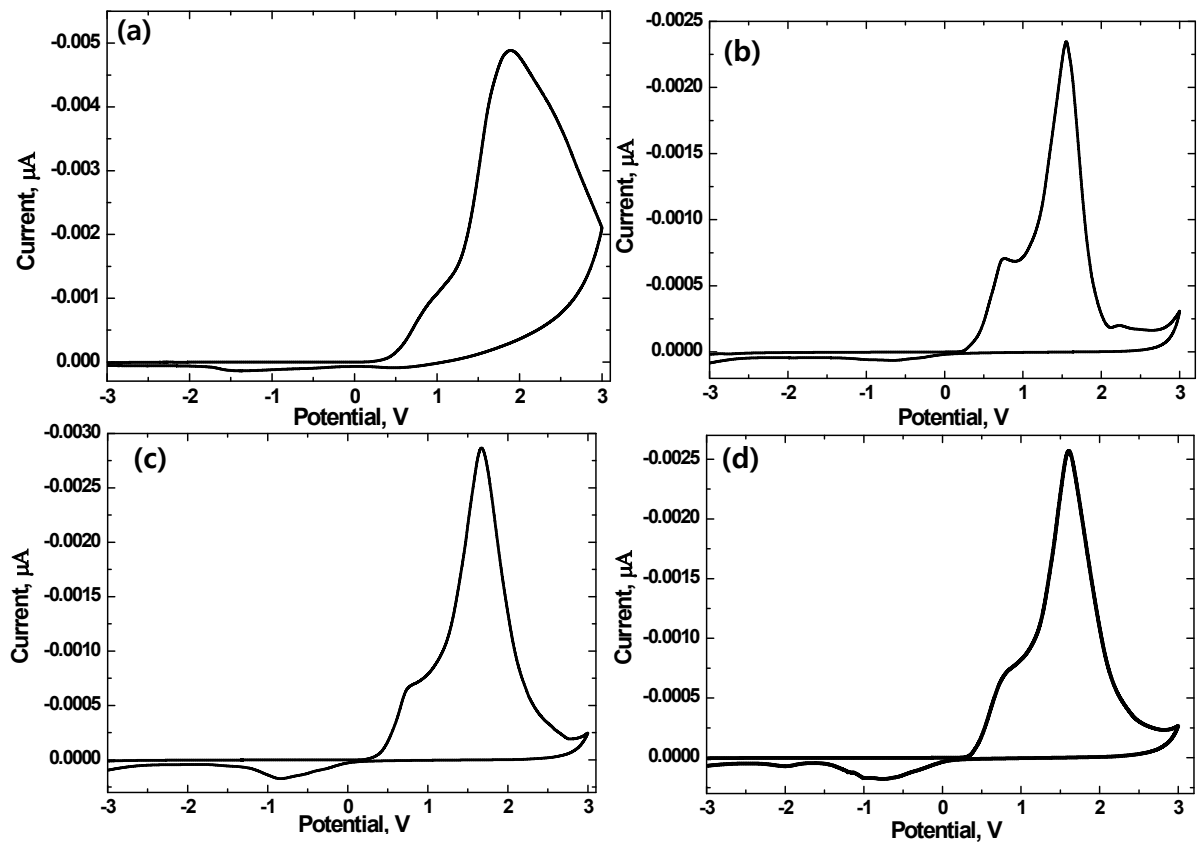

Fig. S4.

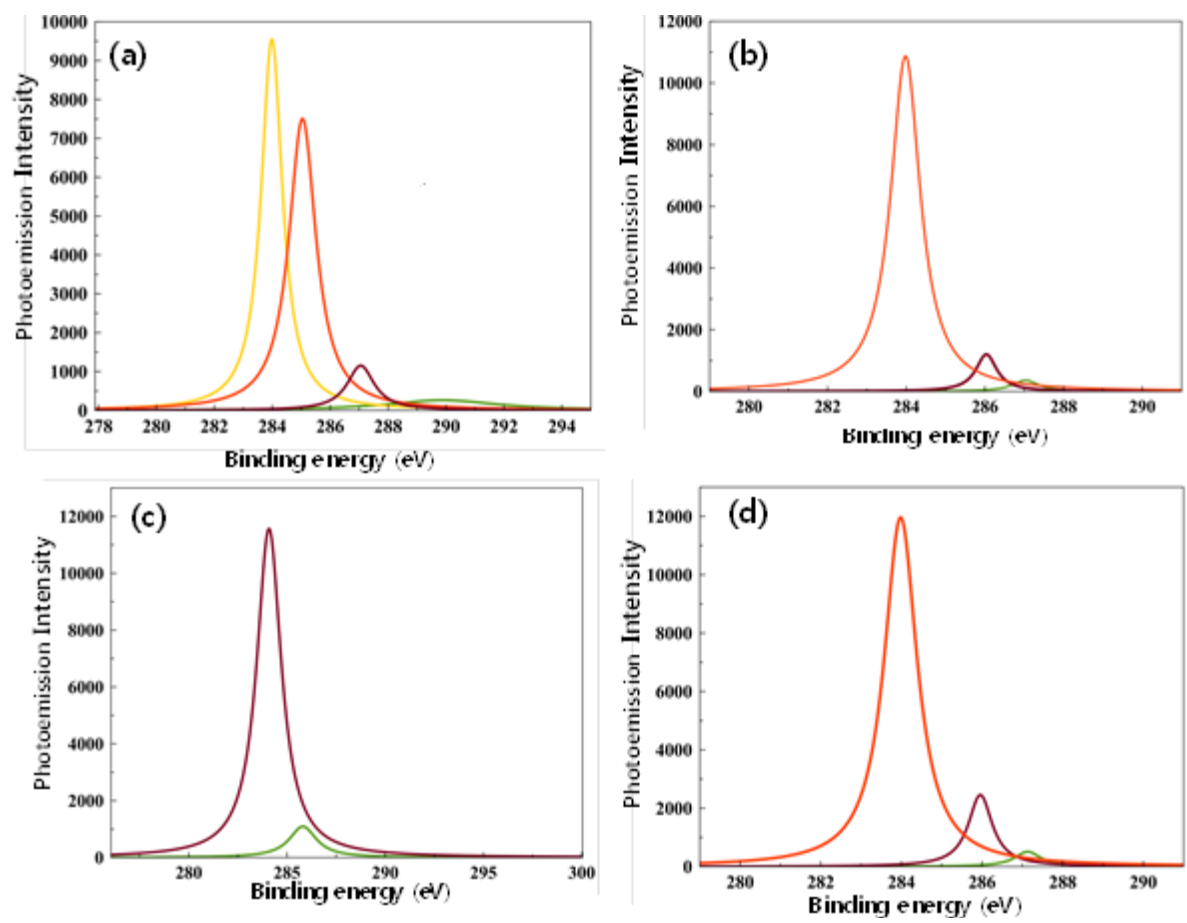

Fig. S5.

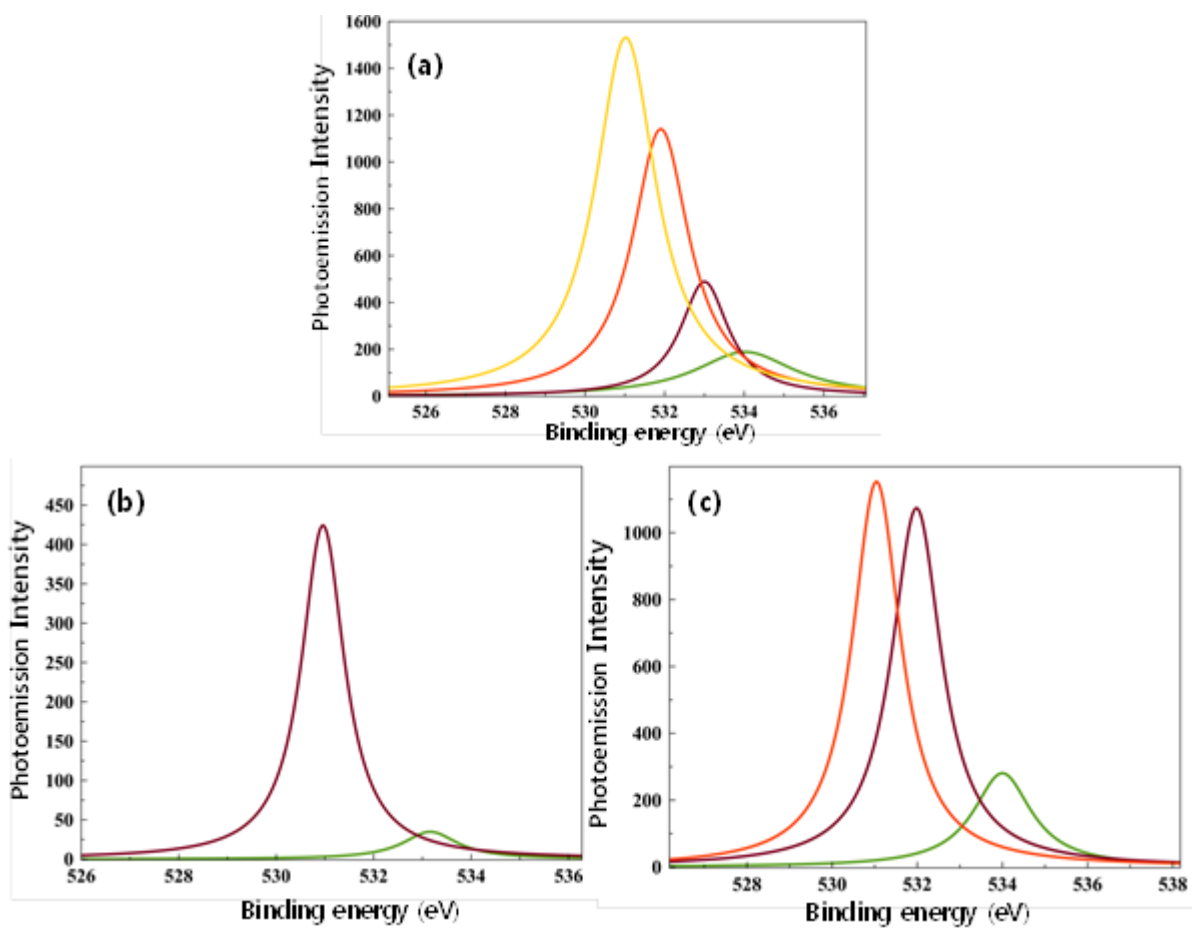

Fig. S6.

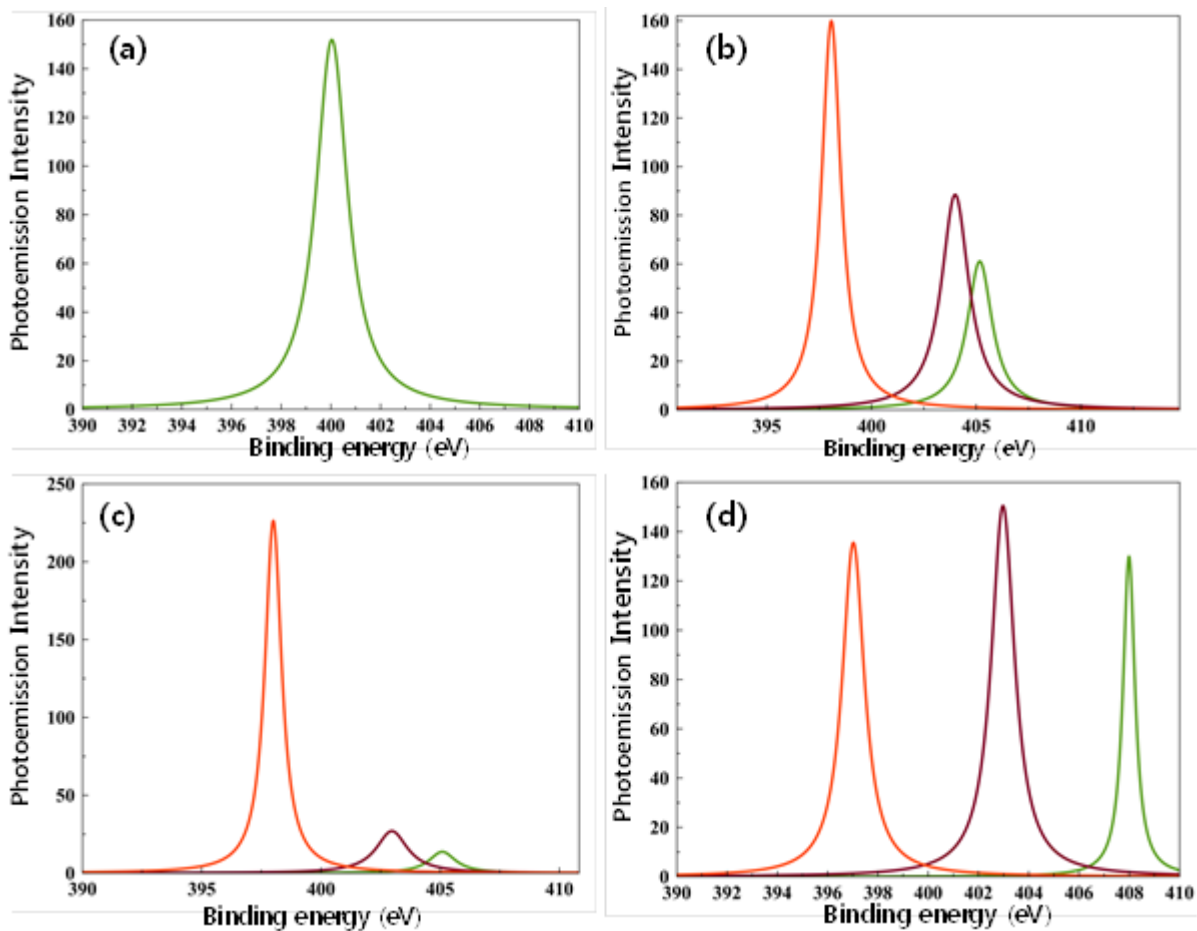

Fig. S7.



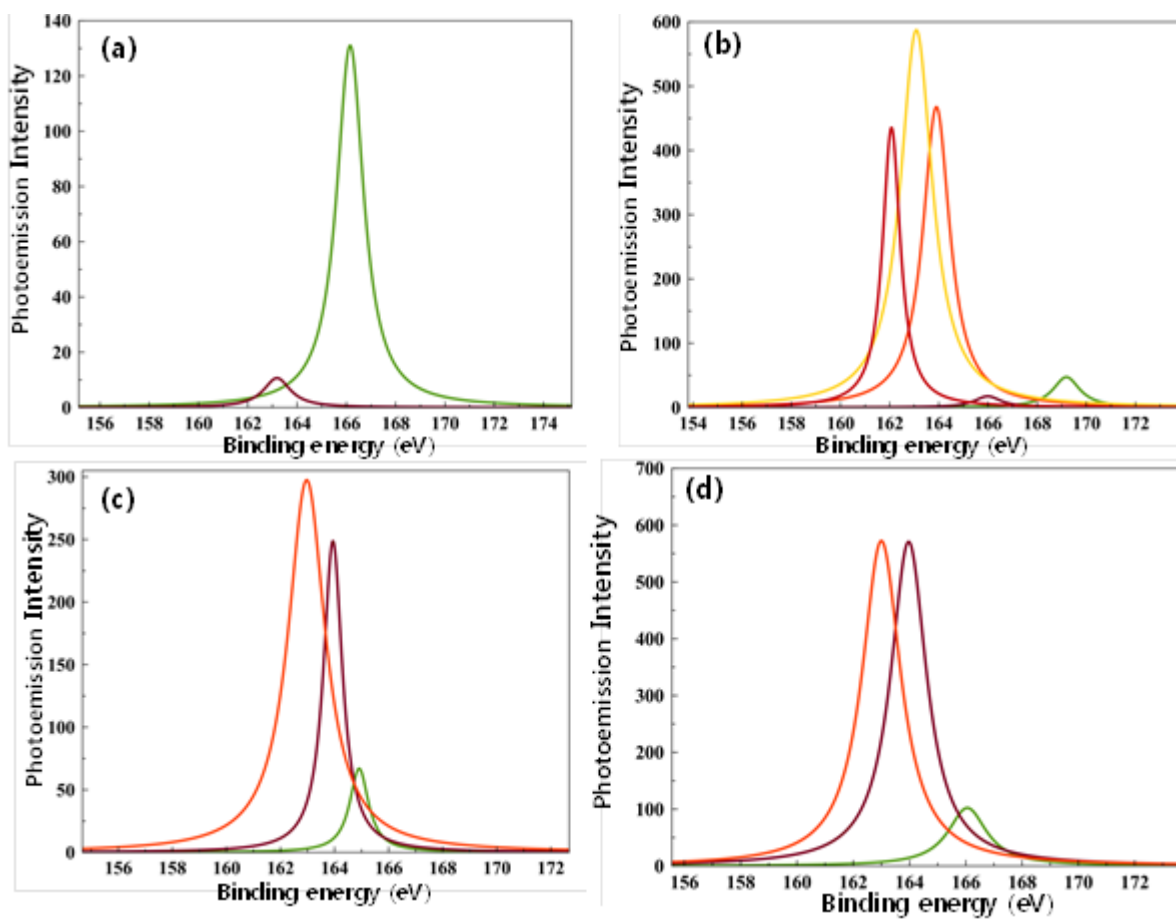

Fig. S8.
